# Supplementary material for: Preventable risk factors of dementia: Population attributable fractions in a Brazilian population-based study
Source: PubMed Central journal article supplement — Lancet Reg Health Am. 2022 Apr 7;11:100256. doi: 10.1016/j.lana.2022.100256 (PMC9903643; doi:10.1016/j.lana.2022.100256), 2022-04-07
Supplement: mmc1.pdf [file mmc1.pdf]

## **Supplementary material**

### **Title:**

Preventable risk factors for dementia: Population Attributable Fractions in a Brazilian population-based study.

### **Authors:**

Wyllians Vendramini Borelli, PhD 1

Vanessa Bielefeldt Leotti, PhD 2,3

Matheus Zschornack Strelow, MD 1

Márcia Lorena Fagundes Chaves, PhD 1

Raphael Machado Castilhos, PhD 1 \*

## Table of contents

|                                                                                                                              |   |
|------------------------------------------------------------------------------------------------------------------------------|---|
| Supplementary Table 1. ELSI-Brazil variables collected for this study and their corresponding responses and definitions..... | 3 |
| Supplementary Panel 1. Formula to calculate weighted PAF.....                                                                | 5 |
| References.....                                                                                                              | 6 |

**Supplementary Table 1. ELSI-Brazil variables collected for this study and their corresponding responses and definitions.**

| Variable            | ELSI-Brazil code (Alphabetical order) | Question description                                                                                                                                                                                                            | Possible answers                                                                         | Variable definition                                                                            |
|---------------------|---------------------------------------|---------------------------------------------------------------------------------------------------------------------------------------------------------------------------------------------------------------------------------|------------------------------------------------------------------------------------------|------------------------------------------------------------------------------------------------|
| Family income       | D28                                   | <i>"When you sum all monthly income of all inhabitants of this house, which of the following options describe the total inhouse income?"</i>                                                                                    | 17 options according to the number of minimum wage strata (1, 1 to 2, 2 to 3, and so on) | -                                                                                              |
| Ethnicity           | E9                                    | <i>"Which of the following options best describes your race?"</i>                                                                                                                                                               | White, Black, Brown, Yellow (Asian), Indigenous                                          | -                                                                                              |
| Less education      | E22                                   | <i>"What was the highest grade in school that you completed?"</i>                                                                                                                                                               | Years of formal education                                                                | Less than 4 years                                                                              |
| Physical inactivity | L5                                    | <i>"In how many days of the last week did you walk for at least 10 continuous minutes, at home or at work, as a way of transportation to get from one place to another, for leisure, for pleasure or as a way of exercise?"</i> | Number of days a week                                                                    | Less than 3 days a week of walking or any physical exercise                                    |
| Alcohol consumption | L25                                   | <i>"How many days a week do you usually drink alcohol?"</i>                                                                                                                                                                     | Number of days a week                                                                    | (Doses*day per week) in grams                                                                  |
|                     | L26                                   | <i>"In general, on the day you drink, how many doses do you take?"</i>                                                                                                                                                          | Number of doses a day                                                                    |                                                                                                |
| Heavy drinking      | L25, L26                              | -                                                                                                                                                                                                                               | -                                                                                        | Alcohol consumption above 21 units/week (equivalent to 168 grams of pure alcohol) <sup>1</sup> |
| Smoking             | L30                                   | <i>"Do you currently smoke?"</i>                                                                                                                                                                                                | Yes, daily; Yes, less than daily; No                                                     | Answering "Yes, daily" or "Yes, less than daily"                                               |
| Obesity             | MF22                                  | <i>Average weight</i>                                                                                                                                                                                                           | -                                                                                        | Body mass index: $(MF22/(MF13*MF13)) \geq 29$                                                  |
|                     | MF13                                  | <i>Average height</i>                                                                                                                                                                                                           | -                                                                                        |                                                                                                |
| Hearing aids        | N15                                   | Do you use a hearing device?                                                                                                                                                                                                    | No, Yes                                                                                  |                                                                                                |
| Hearing loss        | N16                                   | <i>"How do you evaluate your hearing (even when using a hearing device)?"</i>                                                                                                                                                   | Very good, good, regular, bad, very bad                                                  | Answering "bad" or "very bad"                                                                  |
| Hypertension        | N28                                   | <i>"Has any doctor ever told you that you have hypertension (high blood pressure)?"</i>                                                                                                                                         | No, Yes                                                                                  | Answering "Yes"                                                                                |
| Diabetes            | N35                                   | <i>"Has any doctor ever told you that you have diabetes ("high blood sugar")?"</i>                                                                                                                                              | No, Yes                                                                                  | Answering "Yes"                                                                                |
| Depression          | N59                                   | <i>"Has a doctor ever told you that you have depression?"</i>                                                                                                                                                                   | No, Yes                                                                                  | Answering "Yes"                                                                                |

|                  |    |                                                                                                                  |                                                                                                                                 |                                            |
|------------------|----|------------------------------------------------------------------------------------------------------------------|---------------------------------------------------------------------------------------------------------------------------------|--------------------------------------------|
| Illiteracy       | Q2 | <i>“Do you know how to read and write a note?”</i>                                                               | No, Yes                                                                                                                         | Answering "No"                             |
| Social isolation | S2 | <i>“How often do you meet (in person) with any of your children, not counting the ones that live with you?”</i>  | 3 or more times a week, 1-2 times a week, 1-2 times a month, every 2-3 months, 1-2 times a year, Less than once a year or never | Less than once per month on S2 or S5 or S8 |
|                  | S5 | <i>“How often do you meet (in person) with any of your relatives, not counting the ones that live with you?”</i> |                                                                                                                                 |                                            |
|                  | S8 | <i>“How often do you meet (in person) with any of your friends, not counting the ones that live with you?”</i>   |                                                                                                                                 |                                            |

**Supplementary Panel 1. Formula to calculate weighted PAF.**

$$\text{Individual unweighted PAF} = \text{Pe}(\text{RRe} - 1) / (1 + \text{Pe}[\text{RRe} - 1])$$

$$\text{Overall unweighted PAF} = 1 - [(1 - \text{PAF hypertension}) * (1 - \text{PAF diabetes}) * (1 - \text{PAF depression}) \dots]$$

$$\text{Weighted PAF} = (\text{individual PAF}) / \sum (\text{individual PAF}) * (\text{overall PAF})$$

Pe is the Prevalence of the exposure and RRe is the Relative Risk associated with that exposure. Prevalence of the exposure was estimated using the ELSI-Brazil cohort, while Relative Risk was presented by Livingston *et al.* 2020<sup>2</sup>.

## References

1. (WHO) World Health Organization. 2018. Global status report on alcohol and health 2018. Geneva. Website: <https://apps.who.int/iris/bitstream/handle/10665/274603/9789241565639-eng.pdf>. Accessed on February 6, 2022.
2. Livingston G, Huntley J, Sommerlad A, Ames D, Ballard C, Banerjee S, et al. Dementia prevention, intervention, and care: 2020 report of the Lancet Commission. *Lancet*. 2020 Aug 8;396(10248):413–46.
